# Supplementary material for: Anticancer Activity of Gukulenin A Isolated from the Marine Sponge Phorbas gukhulensis In Vitro and In Vivo
Source: PubMed Central journal article supplement (PMC6410303; doi:10.3390/md17020126), 2019-02-21
Supplement: marinedrugs-17-00126-s001.pdf [file marinedrugs-17-00126-s001.pdf]

## Supplementary Materials:

**Table S1. Cytotoxic activity of gukulenin A in human ovarian cancer cells.**

| cell lines | IC <sub>50</sub> <sup>a</sup> (μM) |              |
|------------|------------------------------------|--------------|
|            | gukulenin A                        | cisplatin    |
| TOVG-21G   | 0.04 ± 0.00                        | 42.67 ± 5.25 |
| OVCAR-3    | 0.13 ± 0.02                        | 11.76 ± 2.17 |
| A2780      | 0.03 ± 0.00                        | 20.61 ± 1.89 |
| SKOV3      | 0.36 ± 0.06                        | 28.90 ± 1.07 |

<sup>a</sup>IC<sub>50</sub> is defined as the concentration that reduces the number of cells by 50% compared with control cultures. The values represent the means of the results from three independent experiments with similar patterns.

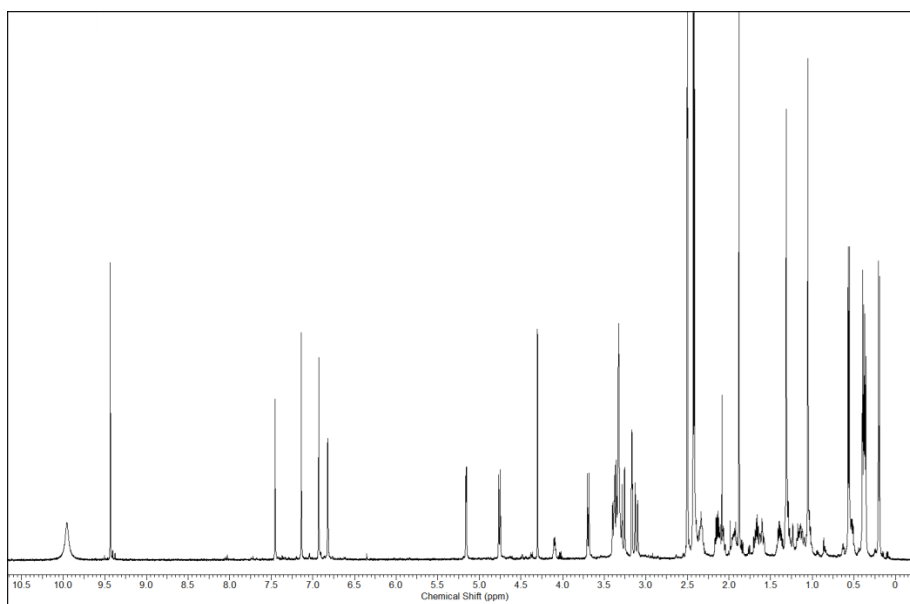

**Figure S1. H-NMR spectrum of gukulenin A.**
